# Supplementary material for: Theoretical Calculation on the Reaction Mechanisms, Kinetics and Toxicity of Acetaminophen Degradation Initiated by Hydroxyl and Sulfate Radicals in the Aqueous Phase
Source: MDPI journal article supplement (doi:10.3390/toxics9100234), 2021-09-25
Supplement: s1 [file s1]

# Supplementary Materials: Theoretical Calculation on the Reaction Mechanisms, Kinetics and Toxicity of Acetaminophen Degradation Initiated by Hydroxyl and Sulfate Radicals in the Aqueous Phase

Mengmeng Xu, Junfang Yao, Simei Sun, Suding Yan and Jingyu Sun

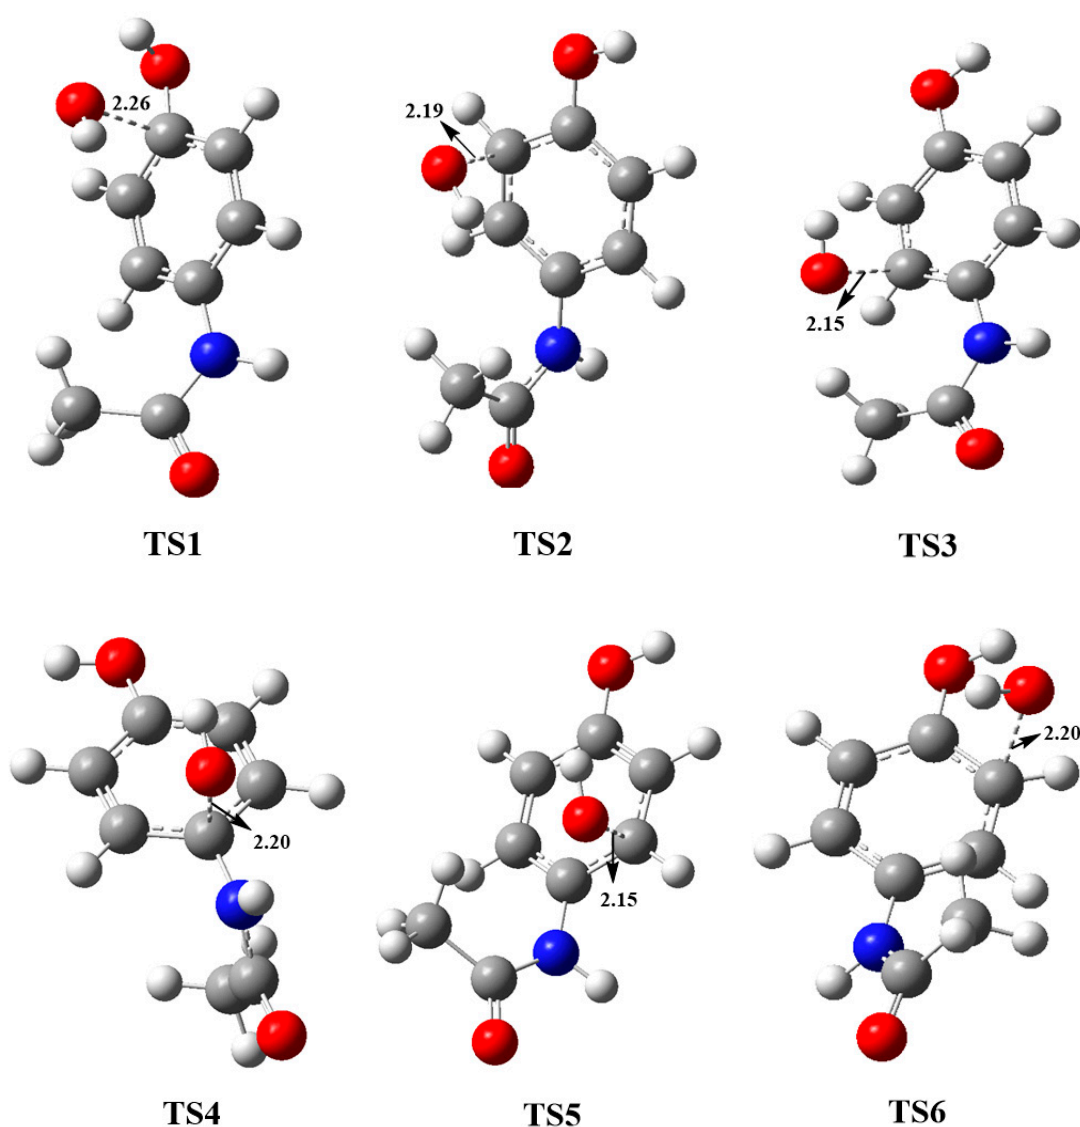

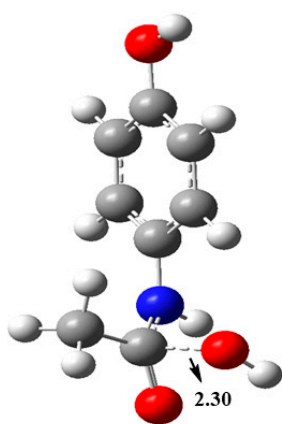

**TS7**

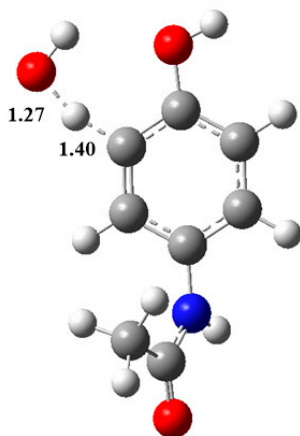

**HTS15**

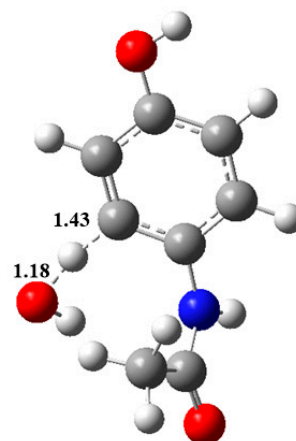

**HTS16**

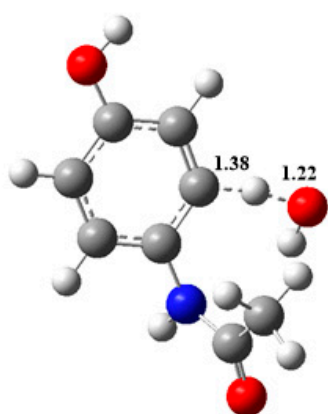

**HTS17**

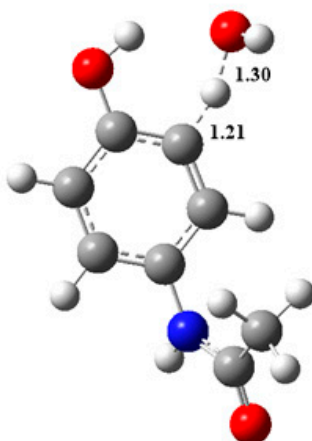

**HTS18**

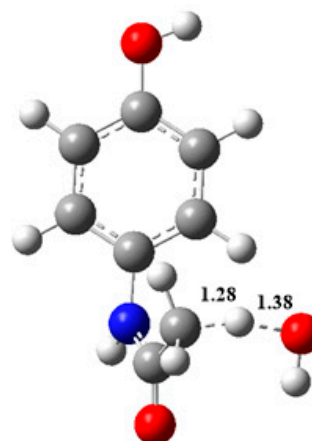

**HTS19**

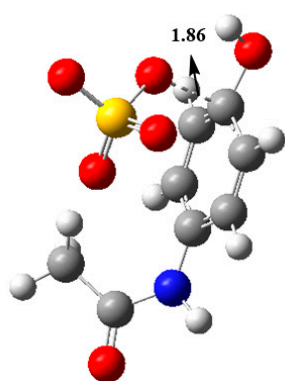

**TS8**

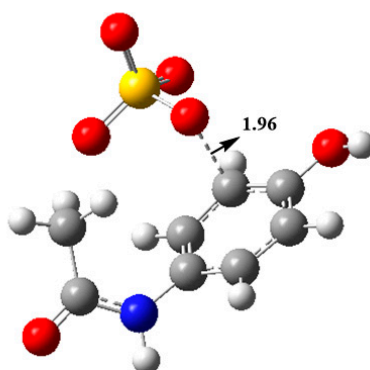

**TS9**

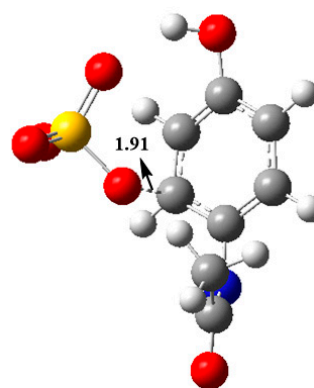

**TS10**

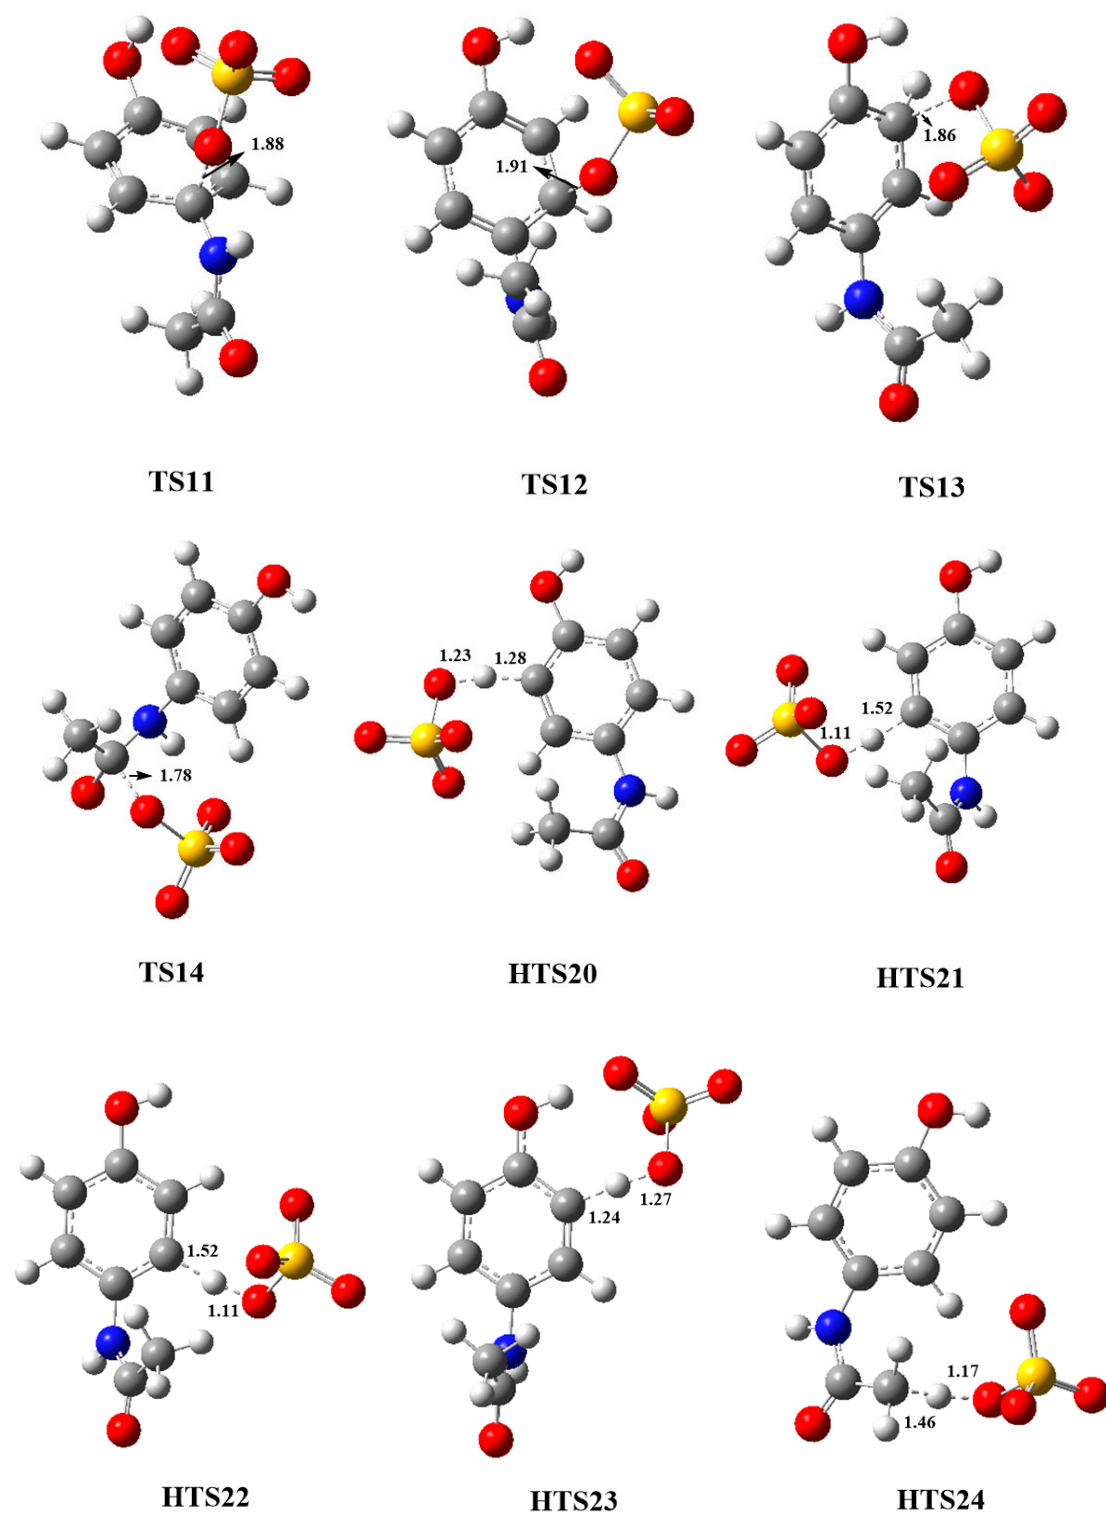

**Figure S1.** Optimized geometries involving the transition states of AAP with  $\bullet\text{OH}$  and  $\text{SO}_4^{\bullet-}$  at the M06-2X/6-31+G(d,p) level. Here,  $\text{H}$  (white),  $\text{C}$  (grey),  $\text{O}$  (red),  $\text{S}$  (yellow),  $\text{N}$  (blue).

**Table S1.** Calculated rate constants of AAP with •OH from 198 to 338 K and 1 atm.

| Paths                        | 198      | 218      | 238      | 258      | 278      | 298      | 318      | 338      |
|------------------------------|----------|----------|----------|----------|----------|----------|----------|----------|
| Path1                        | 8.04E+07 | 9.44E+07 | 8.82E+07 | 8.42E+07 | 8.17E+07 | 8.04E+07 | 7.99E+07 | 8.00E+07 |
| Path2                        | 1.87E+08 | 2.49E+08 | 2.24E+08 | 2.07E+08 | 1.95E+08 | 1.87E+08 | 1.82E+08 | 1.79E+08 |
| Path3                        | 1.51E+07 | 1.25E+07 | 1.30E+07 | 1.36E+07 | 1.43E+07 | 1.51E+07 | 1.59E+07 | 1.68E+07 |
| Path4                        | 3.22E+08 | 5.08E+08 | 4.32E+08 | 3.81E+08 | 3.46E+08 | 3.22E+08 | 3.04E+08 | 2.92E+08 |
| Path5                        | 3.33E+07 | 3.51E+07 | 3.40E+07 | 3.34E+07 | 3.32E+07 | 3.33E+07 | 3.36E+07 | 3.41E+07 |
| Path6                        | 9.02E+09 | 7.84E+09 | 6.01E+09 | 4.86E+09 | 4.10E+09 | 3.56E+09 | 3.18E+09 | 2.90E+09 |
| Path7                        | 6.75E+02 | 2.04E+01 | 6.00E+01 | 1.51E+02 | 3.36E+02 | 6.75E+02 | 1.25E+03 | 2.17E+03 |
| Path15                       | 7.36E-04 | 7.95E-03 | 5.80E-02 | 3.14E-01 | 1.34E+00 | 4.75E+00 | 1.44E+01 | 3.88E+01 |
| Path16                       | 4.40E-03 | 3.55E-02 | 2.03E-01 | 8.95E-01 | 3.21E+00 | 9.75E+00 | 2.60E+01 | 6.20E+01 |
| Path17                       | 4.51E-04 | 4.36E-03 | 2.89E-02 | 1.44E-01 | 5.74E-01 | 1.91E+00 | 5.51E+00 | 1.41E+01 |
| Path18                       | 1.28E+02 | 4.16E+02 | 1.11E+03 | 2.57E+03 | 5.30E+03 | 1.15E+04 | 1.75E+04 | 2.89E+04 |
| Path19                       | 9.61E+01 | 3.51E+02 | 1.03E+03 | 2.59E+03 | 5.73E+03 | 1.13E+04 | 2.11E+04 | 3.65E+04 |
| <i>k</i> <sub>total-aq</sub> | 9.65E+09 | 8.74E+09 | 6.80E+09 | 5.58E+09 | 4.77E+09 | 4.20E+09 | 3.80E+09 | 3.51E+09 |

**Table S2.** Calculated rate constants of AAP with SO<sub>4</sub><sup>•−</sup> from 198 to 338 K and 1 atm.

| Paths                        | 198      | 218      | 238      | 258      | 278      | 298      | 318      | 338      |
|------------------------------|----------|----------|----------|----------|----------|----------|----------|----------|
| Path8                        | 9.43E+16 | 6.50E+15 | 7.13E+14 | 1.12E+14 | 2.32E+13 | 6.00E+12 | 1.86E+12 | 6.67E+11 |
| Path9                        | 2.08E+14 | 2.85E+13 | 5.53E+12 | 1.40E+12 | 4.37E+11 | 1.61E+11 | 6.78E+10 | 3.19E+10 |
| Path10                       | 1.76E+14 | 2.87E+13 | 6.44E+12 | 1.85E+12 | 6.43E+11 | 2.60E+11 | 1.19E+11 | 6.04E+10 |
| Path11                       | 2.14E+13 | 3.50E+12 | 7.92E+11 | 2.29E+11 | 8.03E+10 | 3.28E+10 | 1.51E+10 | 7.74E+09 |
| Path12                       | 1.70E+14 | 2.78E+13 | 6.24E+12 | 1.79E+12 | 6.23E+11 | 2.52E+11 | 1.16E+11 | 5.85E+10 |
| Path13                       | 5.65E+18 | 2.66E+17 | 2.12E+16 | 2.53E+15 | 4.13E+14 | 8.65E+13 | 2.22E+13 | 6.76E+12 |
| Path14                       | 1.46E-11 | 3.47E-10 | 4.91E-09 | 4.67E-08 | 3.26E-07 | 1.77E-06 | 7.86E-06 | 2.95E-05 |
| Path20                       | 3.98E-02 | 1.93E-01 | 7.25E-01 | 2.25E+00 | 6.02E+00 | 1.43E+01 | 3.07E+01 | 6.10E+01 |
| Path21                       | 1.18E+00 | 4.02E+00 | 1.12E+01 | 2.69E+01 | 5.75E+01 | 1.11E+02 | 2.00E+02 | 3.37E+02 |
| Path22                       | 2.81E+00 | 8.72E+00 | 2.25E+01 | 5.06E+01 | 1.02E+02 | 1.88E+02 | 3.23E+02 | 5.24E+02 |
| Path23                       | 1.70E-02 | 8.03E-02 | 2.96E-01 | 9.03E-01 | 2.38E+00 | 5.55E+00 | 1.18E+01 | 2.31E+01 |
| Path24                       | 4.59E+09 | 1.71E+09 | 7.59E+08 | 3.84E+08 | 2.16E+08 | 1.33E+08 | 8.70E+07 | 6.05E+07 |
| <i>k</i> <sub>total-aq</sub> | 5.74E+18 | 2.73E+17 | 2.19E+16 | 2.65E+15 | 4.38E+14 | 9.32E+13 | 2.44E+13 | 7.59E+12 |

**Table S3.** The acute and chronic toxicity class (mg L<sup>−1</sup>).

| Classification | Acute toxicity <sup>1</sup>                            | Chronic toxicity <sup>2</sup> |
|----------------|--------------------------------------------------------|-------------------------------|
| Not harmful    | LC <sub>50</sub> >100 or EC <sub>50</sub> >100         | ChV>10                        |
| Harmful        | 10< LC <sub>50</sub> <100 or 10< EC <sub>50</sub> <100 | 1< ChV <10                    |
| Toxic          | 1< LC <sub>50</sub> <10 or 1< EC <sub>50</sub> <10     | 0.1< ChV <1                   |
| Very toxic     | LC <sub>50</sub> <1 or EC <sub>50</sub> <1             | ChV<0.1                       |

<sup>1</sup>Criteria set by the European Union (described in Annex VI of Directive 67/548/EEC);<sup>2</sup>Criteria set by the Chinese hazard evaluation guidelines for new chemical substances (HJ/T 154–2004).**Table S4.** Eco-toxicity values of AAP and its transformation intermediates to aquatic organisms (mg L<sup>−1</sup>).

|                        |                                 | AAP  | IM1  | IM13                | IM8                 | IM6  |
|------------------------|---------------------------------|------|------|---------------------|---------------------|------|
| Acute Toxicity         | Fish (LC <sub>50</sub> )        | 323  | 7.08 | 186                 | 120                 | 21.4 |
|                        | Daphnia (LC <sub>50</sub> )     | 63.1 | 21.4 | 933                 | 562                 | 77.6 |
|                        | Green algae (EC <sub>50</sub> ) | 26.3 | 3.47 | 0.73                | 34.7                | 64.6 |
| Chronic Toxicity (ChV) | Fish                            | 26.3 | 5.50 | 6.2×10 <sup>3</sup> | 2.0×10 <sup>3</sup> | 64.6 |
|                        | Daphnia                         | 5.13 | 1.95 | 602                 | 269                 | 14.8 |
|                        | Green algae                     | 37.2 | 5.50 | 692                 | 347                 | 29.5 |
